# Supplementary material
Source: ML conference proceedings conference paper supplement (https://proceedings.mlr.press/v84/grunewalder18a.html)
Supplement: Supplementary file [file grunewalder18a-supp.pdf]

## Supplementary material of the paper

### Plug-in Estimators for Conditional Expectations and Probabilities

#### A Families of Sets and Functions

**Lemma A.1** (Proof of Proposition 2.1).  $\mathcal{C}$  is a universal Donsker class if  $\mathbb{X}$  is  $\mathbb{R}^d$  or  $[0, 1]^d$ .

*Proof.* We apply Corollary 6.20 of Dudley (2014).

(i) The set  $\mathcal{C}$  has *finite VC dimension* bounded by  $2d + 1$ . **P** Consider arbitrary  $2d + 1$  points  $\mathbf{x}_1, \mathbf{x}_2, \dots \in \mathbb{X}$ . Now, there is at least one element  $\mathbf{x}_i$  which attains the maximum in dimension  $j$ ,  $1 \leq j \leq d$ , i.e.  $\mathbf{x}_{ij} = \max_{l \leq d} \mathbf{x}_{lj}$ . Select for every dimension such an element and, in the same way, select  $d$  minimizers. Denote the joint set of these points with  $B$ . Then every element from  $\mathcal{C}$  that contains  $B$  also contains  $\mathbf{x}_1, \dots, \mathbf{x}_{2d+1}$  and there is no set  $A \in \mathcal{C}$  which fulfills  $A \cap \{\mathbf{x}_i : 1 \leq i \leq 2d + 1\} = B$ . **Q**

(ii) The set  $\mathbb{X}$  is a Borel set. Hence  $\chi_{\mathbb{X}} \in \mathcal{L}^2(\mathbb{X}, P)$  for every probability measure  $P$  on the Borel sets and  $\chi_{\mathbb{X}}$  is an *envelope function* of  $\mathcal{C}$ .

(iii)  $\mathcal{C}$  is *image admissible Suslin*. **P** Let  $\mathbb{Y} = \mathbb{X} \times [0, \infty[$  equipped with the natural topology, which is the one induced by the Euclidean metric, and the corresponding Borel  $\sigma$ -algebra.  $\mathbb{Y}$  is a Polish space since it is a closed subset of the complete space  $\mathbb{R}^{d+1}$ .

Consider now the map  $T(\mathbf{y}, h) = \chi([\mathbf{y}, \mathbf{y} + h\mathbf{1}])$  if  $[\mathbf{y}, \mathbf{y} + h\mathbf{1}] \in \mathcal{C}$  and  $\chi(\emptyset)$  otherwise.  $T$  maps  $\mathbb{Y}$  onto  $\mathcal{C}$ . We need to verify that  $(\mathbf{y}, h, x) \mapsto (T(\mathbf{y}, h))(x)$  is jointly measurable, that is for any Borel subset  $A$  of  $\mathbb{R}$

$$B = \{(\mathbf{y}, h, x) : \mathbf{x}, \mathbf{y} \in X, h \in [0, \infty[, (T(\mathbf{y}, h))(x) \in A\}$$

must be in the product  $\sigma$ -algebra.  $T(\mathbf{y}, h)(x)$  attains either the value 0 or 1 hence there are four events we need to consider. First  $A = \emptyset$  which implies  $B = \emptyset$  and  $\{0, 1\} \subseteq A$  which implies  $B = \mathbb{Y}$  are always in the  $\sigma$ -algebra.

So consider now a set  $A$  such that  $1 \in A$  but not 0, then

$$\begin{aligned} B &= \{(\mathbf{y}, h, \mathbf{x}) : \mathbf{x}, \mathbf{y} \in \mathbb{X}, h \in [0, \infty[, \chi([\mathbf{y}, \mathbf{y} + h\mathbf{1}])(\mathbf{x}) = 1\} \\ &= \{(\mathbf{y}, h, \mathbf{x}) : \mathbf{x}, \mathbf{y} \in \mathbb{X}, h \in [0, \infty[, \mathbf{x} \in [\mathbf{y}, \mathbf{y} + h\mathbf{1}]\}. \end{aligned}$$

This set is closed in the natural topology of  $\mathbb{X} \times [0, \infty[ \times \mathbb{X}$  since, if  $(\mathbf{y}, h, \mathbf{x})$  is not in  $B$  then with  $\epsilon < d(\mathbf{x}, [\mathbf{y}, \mathbf{y} + h\mathbf{1}])$ , where  $d$  is the Euclidean metric, we have that the open ball

$$\{(u, \eta, \xi) : d(\mathbf{y}, u), d(h, \eta), d(\mathbf{x}, \xi) < \epsilon/3, u, \xi \in \mathbb{X}, \eta \in [0, \infty[\} \subseteq \mathbb{Y} \times \mathbb{X} \setminus B$$

contains  $(\mathbf{y}, h, \mathbf{x})$ . And, since,

$$(\mathbb{Y} \times \mathbb{X}) \setminus B = \{(\mathbf{y}, h, \mathbf{x}) : \mathbf{x}, \mathbf{y} \in \mathbb{X}, h \in [0, \infty[, (T(\mathbf{y}, h))(x) = 0\}$$

the latter set is open. Hence, both sets are in the Borel algebra  $\mathcal{B}(\mathbb{Y} \times \mathbb{X})$ .

It remains to show that the product algebra equals the Borel algebra, that is,

$$\mathcal{B}(\mathbb{Y}) \otimes \mathcal{B}(\mathbb{X}) = \mathcal{B}(\mathbb{Y} \times \mathbb{X}).$$

This follows from Fremlin (2003)[4A3D(ci)] if  $\mathbb{Y} \times \mathbb{X}$  is a hereditary Lindelöf space. Though, every second countable space like  $\mathbb{Y} \times \mathbb{X}$  is hereditary Lindelöf and the result follows. **Q** □

**Lemma A.2** (Proof of Lemma 2.3). Let  $\mathbb{X}$  be any set and  $\mathcal{G}$  be a  $\sigma$ -algebra of subsets of  $\mathbb{X}$ .  $\mathcal{E}$  is a VC-class if, and only if,  $\mathcal{E}$  is a finite family of sets.

*Proof.* Any finite collection of sets is a VC-class. For the other direction assume  $\mathcal{E}$  is infinite.

(i) There exists a countably infinite sequence of disjoint sets in  $\mathcal{E}$ . **P** We prove by induction that for any  $n \in \mathbb{N}$  there exist  $n$  disjoint sets in  $\mathcal{E}$ . The induction hypothesis is trivially fulfilled for  $n = 1$ . For the induction step let us assume that

$A_1, \dots, A_n \in \mathcal{G}$  are not empty and mutually disjoint. There exists an element  $B \in \mathcal{G}$  that is not contained in  $\sigma(A_1, \dots, A_n)$  since otherwise  $\mathcal{G} = \sigma(A_1, \dots, A_n)$  and  $\mathcal{G}$  would be finite. Take such an element  $B$ . If  $B \setminus \bigcup_{i \leq n} A_i \in \mathcal{G}$  is not empty then add this to the sequence as  $A_{n+1}$ .  $A_{n+1}$  is then obviously disjoint from all  $A_1, \dots, A_n$ . If  $B \setminus \bigcup_{i \leq n} A_i = \emptyset$  then  $B \subsetneq \bigcup_{i \leq n} A_i$ . Furthermore, there is some  $i \leq n$  such that  $A_i \setminus B \neq \emptyset \neq A_i \cap B$ , because otherwise  $B$  would be a union of a subset of  $A_1, \dots, A_n$ . Now, remove  $A_i$  from the sequence and add  $A_i \setminus B$  and  $A_i \cap B$  to the sequence. This way we gain  $n+1$  disjoint elements that are all contained in  $\mathcal{G}$ . This implies now directly that there is a countably infinite sequence of disjoint sets contained in  $\mathcal{G}$ .  $\blacksquare$

(ii) By (i) we can choose a sequence  $\{A_n\}_{n \in \mathbb{N}}$  of disjoint and non-empty subsets of  $\mathcal{G}$ . By countable choice we can select a sequence  $\{x_n\}_{n \in \mathbb{N}}$  such that  $x_n \in A_n$ . Consider any  $k \in \mathbb{N}$ , points  $x_1, \dots, x_k$  and any subset of these, say  $\{x_{n_i} : i \leq l, 0 \leq n_1 < n_2 < \dots < n_l \leq k\}$  for  $l \leq k$  and consider the corresponding sequence of sets  $\{A_{n_i} : i \leq l\}$  then  $\{x_{n_i} : i \leq l\} = \{x_n\}_{n \leq k} \cap \bigcup \{A_{n_i} : i \leq l\}$  and the set  $\{x_i\}_{i \leq k}$  is shattered. Since this argument applies to any  $k \in \mathbb{N}$  we know that  $\mathcal{G}$  is not a VC-class.  $\square$

**Lemma A.3** (Proof of Lemma 5). *Let  $(\Omega, \mathcal{A}, P)$  be a probability space and  $\mathcal{C} \subset \mathcal{A}$  a disjoint family of sets such that for each  $A \in \mathcal{C}$  there exists  $\{A_n\}_{n \in \mathbb{N}}$  in  $\mathcal{C}$  with  $\Omega \setminus A = \bigcup_{n \in \mathbb{N}} A_n$  and  $\emptyset \in \mathcal{C}$ . For any measure  $Q$  for which there exists a constant  $c > 0$  such that for all  $A \in \mathcal{C}$ ,  $|Q(A) - P(A)| \leq cP(A)$ , we have that  $\sup_{A \in \sigma(\mathcal{C})} |Q(A) - P(A)|/P(A) \leq c$ .*

*Proof.* We apply the monotone class theorem.  $A, B \in \mathcal{C}$  then either  $A \cap B = \emptyset \in \mathcal{C}$  or  $A = B \in \mathcal{C}$ . Define

$$\mathcal{D} := \{A : A = \bigcup \mathcal{E}, \mathcal{E} \subseteq \mathcal{C} \text{ a countable family, } |Q(A) - P(A)| \leq cP(A)\}.$$

$\mathcal{D}$  is a Dynkin class: (1)  $\emptyset \in \mathcal{D}$ ; (2)  $A \in \mathcal{D}$  then by assumption  $\Omega \setminus A = \bigcup_{n \in \mathbb{N}} A_n$  for some elements  $A_n \in \mathcal{C}$  and because the  $A_n$  are disjoint we have

$$|Q(\Omega \setminus A) - P(\Omega \setminus A)| \leq \sum_{n \in \mathbb{N}} |Q(A_n) - P(A_n)| \leq c \sum_{n \in \mathbb{N}} P(A_n) = cP(\Omega \setminus A)$$

and  $\Omega \setminus A \in \mathcal{D}$ . (3) If  $\{A_n\}_{n \in \mathbb{N}}$  is a disjoint sequence in  $\mathcal{D}$ , then

$$\left| Q\left(\bigcup_{n \in \mathbb{N}} A_n\right) - P\left(\bigcup_{n \in \mathbb{N}} A_n\right) \right| \leq \sum_{n \in \mathbb{N}} |Q(A_n) - P(A_n)| \leq cP\left(\bigcup_{n \in \mathbb{N}} A_n\right).$$

Since each  $A_n$  is a countable family of elements on  $\mathcal{C}$  we know that  $\bigcup_{n \in \mathbb{N}} A_n$  is also a countable family of elements of  $\mathcal{C}$  and therefore  $\bigcup_{n \in \mathbb{N}} A_n \in \mathcal{D}$ . The result follows now from the monotone class theorem since  $\mathcal{C} \subseteq \mathcal{D}$ .  $\square$

**Corollary A.1** (Proof of Proposition 2.1). *Let  $([0, 1]^d, \mathcal{A}, P)$  be a probability space such that  $P$  has a density  $p$  that is lower bounded by  $b > 0$ . Let  $\{\lambda_n\}_{n \geq 1}$  be a non-decreasing sequence in  $\mathbb{N}_+$  such that  $\lim_{n \rightarrow \infty} \lambda_n = \infty$  then  $\|\nu_n(A)\|_{\sigma(\mathcal{C}_{\lambda_n})} \in O_p^*(\sqrt{\log(n)2^{d\lambda_n/2}})$ . Furthermore, for any Borel set  $A$  and  $\epsilon > 0$  there exists an  $n \in \mathbb{N}$  and  $B \in \sigma(\mathcal{C}_{\lambda_n})$  such that  $P(A \Delta B) \leq \epsilon$ .*

*Proof.* The universal approximation property of the family of sets  $\mathcal{C}$  is well known. We provide here for completeness a simple proof. The set  $\sigma(\mathcal{C}_n)$  contains many intervals. In particular, to every element  $\mathbf{x}'$  in  $\{\mathbf{x} : \mathbf{x}_i \in l_n, i \leq n\}$ , where  $l_n = \{\sum_{i=1}^{\mu_n} d_i/2^i : d_i \in \{0, 1\}\}$ , and any element  $\mathbf{x}''$  in  $\{\mathbf{x} : \mathbf{x}_i \in r_n, i \leq n\}$ , where  $r_n = \{1 - \sum_{i=1}^{\mu_n} d_i/2^i : d_i \in \{0, 1\}\}$ , corresponds an interval  $\mathbf{I} = [\mathbf{x}', \mathbf{x}''] \in \sigma(\mathcal{C}_n)$ . Both,  $\bigcup_{n \geq 1} l_n$  and  $\bigcup_{n \geq 1} r_n$  lie dense in  $[0, 1]$ . This implies that any half-open interval  $[\mathbf{a}, \mathbf{b})$ ,  $0 \leq \mathbf{a}_i < \mathbf{b}_i \leq 1$  for all  $i \leq d$ , can be approximated arbitrary well in Lebesgue measure, i.e. for  $\epsilon > 0$  and with  $\mu$  denoting Lebesgue-measure, there exists an  $n \in \mathbb{N}$  and an  $\mathbf{I} \in \sigma(\mathcal{C}_n)$  such that  $[\mathbf{a}, \mathbf{b}) \subseteq \mathbf{I}$  and  $\mu(\mathbf{I} \setminus [\mathbf{a}, \mathbf{b})) \leq \epsilon$ . Consider now any Borel subset  $A$  of  $[0, 1]^d$  and  $\epsilon > 0$ . Let  $\{\mathbf{I}_n\}_{n \geq 1}$  be a sequence of half-open intervals in  $[0, 1]^d$  such that  $A \subseteq \bigcup_{n \geq 1} \mathbf{I}_n$  and  $\mu(\bigcup_{n \geq 1} \mathbf{I}_n) \leq \mu(A) + \epsilon/4$ . Furthermore, select for each  $\mathbf{I}_n$  an half-open interval  $\mathbf{I}'_n \in \bigcup_{m \geq 1} \sigma(\mathcal{C}_m)$  such that  $\mathbf{I}_n \subseteq \mathbf{I}'_n$  and  $\mu(\mathbf{I}'_n \setminus \mathbf{I}_n) \leq \epsilon/2^{n+2}$  then  $A \subseteq \bigcup_{n \geq 1} \mathbf{I}'_n$  and

$$\mu\left(\bigcup_{n \geq 1} \mathbf{I}'_n\right) \leq \mu\left(\bigcup_{n \geq 1} \mathbf{I}'_n \setminus \bigcup_{n \geq 1} \mathbf{I}_n\right) + \mu\left(\bigcup_{n \geq 1} \mathbf{I}_n\right) \leq \mu(A) + \epsilon/4 + \mu\left(\bigcup_{n \geq 1} (\mathbf{I}'_n \setminus \mathbf{I}_n)\right) \leq \mu(A) + \epsilon/2.$$

Choose an  $N$  such that  $\mu(\bigcup_{n \geq N} \mathbf{I}'_n) \leq \epsilon/2$  and define  $B = \bigcup_{n < N} \mathbf{I}'_n \in \bigcup_{m \geq 1} \sigma(\mathcal{C}_m)$ . Then  $\mu(B \setminus A) \leq \mu(\bigcup_{n \geq 1} \mathbf{I}'_n \setminus A) \leq \epsilon/2$  and  $\mu(A \setminus B) \leq \mu(\bigcup_{n \geq 1} \mathbf{I}_n \setminus B) \leq \epsilon/2$ . Hence,  $\mu(A \Delta B) \leq \epsilon$ . Since  $P$  is absolutely continuous with respect to Lebesgue-measure we can choose for every  $\epsilon > 0$  a  $\delta > 0$  such that  $\mu(A \Delta B) \leq \delta$  implies  $P(A \Delta B) \leq \epsilon$  and the second part of the proposition follows.  $\square$

## B Conditioning

**Proposition B.1** (Proof of Proposition 3.1). *If  $\mathcal{C} \subseteq \mathcal{B}_{\mathfrak{S}}$  is a finite set with  $\inf_{B \in \mathcal{C}} P(B) > 0$ ,  $\mathcal{F}$  is a subset of  $\mathcal{L}^1(P)$  uniformly bounded in supremum norm and  $\mathcal{F}_{\mathcal{C}}$  is a  $P$ -Donsker class then*

$$\sup_{f \in \mathcal{F}} \sup_{B \in \mathcal{C}} |E_n(f | B) - E(f | B)| \in O_P^*(n^{-1/2}).$$

Furthermore, if  $\mathcal{C}' \subseteq \mathcal{B}_{\mathfrak{S}}$ , is such that  $\mathcal{C}'$  is a  $P$ -Donsker class then

$$\sup_{A \in \mathcal{C}'} \sup_{B \in \mathcal{C}} |P_n(A|B) - P(A|B)| \in O_P^*(n^{-1/2}).$$

*Proof.* For a finite family of measurable sets  $\mathcal{C}$  the corresponding set of indicator functions  $\mathcal{C}$  is always a  $P$ -Donsker class since for a single element the standard CLT provides the necessary statement and finite unions of  $P$ -Donsker classes are again  $P$ -Donsker due to (Dudley, 2014)[Thm 4.34]. Hence,

$$\sup_{f \in \mathcal{F}, B \in \mathcal{C}} \left| \int_B f dP_n - \int_B f dP \right| = \sup_{f \in \mathcal{F}, B \in \mathcal{C}} \left| \int f \times \chi(B) dP_n - \int f \times \chi(B) dP \right| = O_P^*(n^{-1/2})$$

and

$$\sup_{B \in \mathcal{C}} |P_n(B) - P(B)| = O_P^*(n^{-1/2}).$$

By definition this implies that for  $\epsilon > 0$  there exists an  $M_1$  such that  $\Pr^*\{\sup_{B \in \mathcal{C}} |P(B) - P_n(B)| > M_1 n^{-1/2}\} < \epsilon/2$  for all  $n \geq 1$ . Let  $N := \lceil (2M_1 / \inf_{B \in \mathcal{C}} P(B))^2 \rceil$ . Because  $\inf_{B \in \mathcal{C}} P(B) > 0$ , for all  $n \geq N$  we have for any  $A \in \mathcal{C}$  that

$$\begin{aligned} \{P_n(A) < \inf_{B \in \mathcal{C}} P(B)/2\} &\subseteq \{P_n(A) < P(A)/2\} = \{P(A) - P_n(A) > P(A)/2\} \\ &\subseteq \{\sup_{B \in \mathcal{C}} |P(B) - P_n(B)| > P(A)/2\} \subseteq \{\sup_{B \in \mathcal{C}} |P(B) - P_n(B)| > \inf_{B' \in \mathcal{C}} P(B')/2\} \\ &\subseteq \{\sup_{B \in \mathcal{C}} |P(B) - P_n(B)| > M_1 n^{-1/2}\}. \end{aligned}$$

Similarly, there exists an  $M_2$  such that  $\Pr^*\{\sup_{f \in \mathcal{F}, B \in \mathcal{C}} |\int_B f dP_n - \int_B f dP| > M_2 n^{-1/2}\} < \epsilon/2$ . The events

$$\Omega_n := \left\{ \sup_{B \in \mathcal{C}} |P(B) - P_n(B)| \leq M_1 n^{-1/2} \right\} \cap \left\{ \sup_{f \in \mathcal{F}, B \in \mathcal{C}} \left| \int_B f dP_n - \int_B f dP \right| \leq M_2 n^{-1/2} \right\}$$

have outer probability  $\Pr^*(\Omega_n) \geq 1 - \epsilon$  and for all  $n \geq N$  and  $B \in \mathcal{C}$ ,  $\Omega_n \subseteq \{P_n(B) \geq \inf_{B' \in \mathcal{C}} P(B')/2\}$ . In the event  $\Omega_n$ ,  $n \geq N$ , we know that  $P_n(B) > 0$  and

$$\begin{aligned} &E_n(f | B) - E(f | B) \\ &= \left( \int_B f dP_n \right) / P_n(B) - \left( \int_B f dP \right) / P(B) \\ &= \left( P(B) \int_B f dP_n - P_n(B) \int_B f dP \right) / (P_n(B)P(B)) \\ &= \left( P(B) \left( \int_B f dP_n - \int_B f dP \right) + (P(B) - P_n(B)) \int_B f dP \right) / (P_n(B)P(B)). \end{aligned} \tag{8}$$

Therefore, for  $n \geq N$  in the event  $\Omega_n$ ,

$$n^{1/2} \sup_{f \in \mathcal{F}, B \in \mathcal{C}} \left| \left( \int_B f dP_n \right) / P_n(B) - \left( \int_B f dP \right) / P(B) \right| \leq 2(M_2 + bM_1)/c^2,$$

where  $b := \sup_{x \in \mathfrak{S}, f \in \mathcal{F}} |f(x)|$  and  $c := \inf_{B \in \mathcal{C}} P(B) > 0$ .

For any  $n < N$  and  $B$  with  $P_n(B) = 0$  the estimate  $E_n(f | B) = 0$  by definition and

$$\sup_{f \in \mathcal{F}} |E_n(f | B) - E(f | B)| = \sup_{f \in \mathcal{F}} \left| \left( \int_B f dP \right) / P(B) \right| \leq b < \infty.$$

For any  $n < N$  with  $P_n(B) > 0$  we have that

$$n^{1/2} \sup_{f \in \mathcal{F}, B \in \mathcal{C}} \left| \left( \int_B f dP_n \right) / P_n(B) - \left( \int_B f dP \right) / P(B) \right| \leq 2n^{1/2}b < \infty$$

and with the constant  $M := \max\{2(M_2 + bM_1)/c^2, 2N^{1/2}b\}$  we have

$$\Pr^* \left\{ \sup_{f \in \mathcal{F}} \sup_{B \in \mathcal{C}} |E_n(f | B) - E(f | B)| > Mn^{-1/2} \right\} \leq \epsilon.$$

This is sufficient to prove the first claim. The second claim follows from the first by substituting  $\mathcal{C}'$  for  $\mathcal{F}$ .  $\square$

**Proposition B.2** (Proof of Proposition 3.2). *If  $\mathcal{C} \subseteq \mathcal{B}_{\mathfrak{S}}$ ,  $\mathcal{C}$  and  $\mathcal{F}_{\mathcal{C}}$  are  $P$ -Donsker classes,  $\mathcal{F}$  is a subset of  $\mathcal{L}^1(P)$  uniformly bounded in supremum norm and  $P$  has a density which is lower bounded by a constant  $b > 0$  then with  $\mathcal{C}_n := \{C : C \in \mathcal{C}, \mu(C) \geq n^{-\alpha}\}$  and  $\alpha \in [0, 1/2]$*

$$\sup_{f \in \mathcal{F}} \sup_{B \in \mathcal{C}_n} |E_n(f | B) - E(f | B)| \in O_P^*(n^{\alpha-1/2}).$$

Furthermore, if  $\mathcal{C}' \subseteq \mathcal{B}_{\mathfrak{S}}$  is such that  $\mathcal{C}'_n$  is a  $P$ -Donsker class then

$$\sup_{A \in \mathcal{C}'} \sup_{B \in \mathcal{C}_n} |P_n(A|B) - P(A|B)| \in O_P^*(n^{\alpha-1/2}).$$

*Proof.* As in the the proof of Proposition 3.1,  $\sup_{f \in \mathcal{F}, B \in \mathcal{C}} |\int_B f dP_n - \int_B f dP| \in O_P^*(n^{-1/2})$  and  $\sup_{B \in \mathcal{C}} |P_n(B) - P(B)| \in O_P^*(n^{-1/2})$ . Hence, for a given  $\epsilon > 0$  there exists a  $M_1$  such that  $\Pr^* \{ \sup_{B \in \mathcal{C}} |P(B) - P_n(B)| > M_1 n^{-1/2} \} < \epsilon/2$ . In particular, since by assumption  $\inf_{B' \in \mathcal{C}_n} P(B')/2 \geq b \inf_{B' \in \mathcal{C}_n} \mu(B')/2 \geq (b/2)n^{-\alpha}$  we have for  $N := \lceil (2M_1/b)^{1/(1/2-\alpha)} \rceil$  and all  $n \geq N$ ,  $B \in \mathcal{C}_n$  that

$$\begin{aligned} \{P_n(B) < \inf_{B' \in \mathcal{C}_n} P(B')/2\} &\subseteq \{ \sup_{B \in \mathcal{C}_n} |P(B) - P_n(B)| > \inf_{B' \in \mathcal{C}_n} P(B')/2 \} \\ &\subseteq \{ \sup_{B \in \mathcal{C}_n} |P(B) - P_n(B)| > (b/2)n^{-\alpha} \} \subseteq \{ \sup_{B \in \mathcal{C}_n} |P(B) - P_n(B)| > M_1 n^{-1/2} \} \\ &\subseteq \{ \sup_{B \in \mathcal{C}} |P(B) - P_n(B)| > M_1 n^{-1/2} \}. \end{aligned}$$

and, since the last event has an outer probability strictly less than  $\epsilon/2$ , there exists an  $M_2$  such that for all  $n \geq N$  the events

$$\Omega_n := \left\{ \sup_{B \in \mathcal{C}} |P(B) - P_n(B)| \leq M_1 n^{-1/2} \right\} \cap \left\{ \sup_{f \in \mathcal{F}, B \in \mathcal{C}} \left| \int_B f dP_n - \int_B f dP \right| \leq M_2 n^{-1/2} \right\}$$

have outer probability  $\Pr^*(\Omega_n) \geq 1 - \epsilon$  and  $\{P_n(B) \geq \inf_{B' \in \mathcal{C}_n} P(B')/2\} \supseteq \Omega_n$  for all  $n \geq N$ .

Using the bound (8)

$$\begin{aligned} &\left| \left( \int_B f dP_n \right) / P_n(B) - \left( \int_B f dP \right) / P(B) \right| \\ &\leq \left| \left( \int_B f dP_n - \int_B f dP \right) / P_n(B) \right| + \left| (P(B) - P_n(B)) \int_B f dP / (P_n(B)P(B)) \right|. \end{aligned}$$

Let  $c = \sup_{x \in \mathfrak{S}} \sup_{f \in \mathcal{F}} |f(x)| < \infty$  then  $|\int_B f dP| \leq cP(B)$  and, since  $P_n(B) \geq (b/2)n^{-\alpha}$  on  $\Omega_n$ , for  $n \geq N$

$$\sup_{f \in \mathcal{F}} \sup_{B \in \mathcal{C}_n} |E_n(f | B) - E(f | B)| \leq (2M_2/b)n^{\alpha-1/2} + (2cM_1/b)n^{\alpha-1/2}.$$

As in the the proof of Proposition 3.1 the errors for  $n < N$  can be bounded since  $\inf_{n < N} \inf_{B \in \mathcal{C}_n} P(B) \geq bN^{-\alpha}$  and the first result follows. Substituting  $\mathcal{C}'$  for  $\mathcal{F}$  yields the second claim.  $\square$

**Lemma B.1.** *If  $\mathcal{G}$  is a  $\sigma$ -algebra consisting of finitely many elements then there exists a unique partition  $\mathcal{P}_{\mathcal{G}}$  such that each element of  $\mathcal{G}$  can be represented as a finite union of elements of  $\mathcal{P}_{\mathcal{G}}$ .*

*Proof.* (i) Uniqueness. Assume there are two partitions  $\mathcal{P}_{\mathcal{G}}$  and  $\mathcal{P}'_{\mathcal{G}}$ . There must be an element  $B \in \mathcal{P}'_{\mathcal{G}}$  that is not in  $\mathcal{P}_{\mathcal{G}}$  (or vice versa) since otherwise  $\mathcal{P}'_{\mathcal{G}} = \mathcal{P}_{\mathcal{G}}$ . This  $B$  is equal to  $A_1 \cup \dots \cup A_n$  for some  $n \in \mathbb{N}$  and disjoint, non-empty, elements  $A_1, \dots, A_n \in \mathcal{P}_{\mathcal{G}}$ . Now  $A_1 \subsetneq B$  but  $A_1$  cannot be a finite union of elements of  $\mathcal{P}'_{\mathcal{G}}$  since  $\mathcal{P}'_{\mathcal{G}}$  is a partition.

(ii) Enumerate  $\mathcal{G}$  as  $A_1, \dots, A_n$  where  $n$  is the cardinality of  $\mathcal{G}$ . We construct a partition iteratively. I.e. we construct for each  $i \leq n$  a family of sets  $\mathcal{B}_i = \{B_{1,i}, \dots, B_{m_i,i}\}$  that is disjoint and such that  $A_1, \dots, A_i$  can be represented as unions of the  $B_{j,i}$  elements. For  $i = 1$  let  $B_{1,1} = A_1$ . Now assume we have such a family of sets for  $i$  and we want to get a family of disjoint sets for  $A_1, \dots, A_{i+1}$ . Consider the following family of set

$$\mathcal{B}_{i+1} = \{A_{i+1} \setminus \bigcup \mathcal{B}_i\} \cup \{B \setminus A_{i+1} : B \in \mathcal{B}_i\} \cup \{A_{i+1} \cap B : B \in \mathcal{B}_i\}.$$

Clearly ever  $B \in \mathcal{B}_i$  can still be represented as a union of elements since  $B = (B \setminus A_{i+1}) \cup (B \cap A_{i+1})$ . Similarly,  $A_{i+1} = (A_{i+1} \setminus \bigcup \mathcal{B}_i) \cup (A_{i+1} \cap \bigcup \mathcal{B}_i)$  can be represented. The family of sets is also disjoint: any element of the form  $B \setminus A_{i+1}$  is certainly disjoint from any  $B' \cap A_{i+1}$  and  $A_{i+1} \setminus B'' \supset A_{i+1} \setminus \bigcup \mathcal{B}_i$ . Also, since the elements in  $\mathcal{B}_i$  are disjoint any two  $B \setminus A_{i+1}$  and  $B' \setminus A_{i+1}$  will be disjoint. Finally, any  $A_{i+1} \cap B$  is disjoint of  $A_{i+1} \setminus \bigcup \mathcal{B}_i$  and  $(A_{i+1} \cap B) \cap (A_{i+1} \cap B') = \emptyset$ . This concludes the induction.  $\square$

**Proposition B.3** (Proof of Proposition 3.3). *If  $\mathcal{G} \subseteq \mathcal{B}_{\mathfrak{S}}$  is a  $\sigma$ -algebra consisting of finitely many sets,  $\mathcal{F}$  is a subset of  $\mathcal{L}^1(P)$  uniformly bounded in supremum norm,  $\mathcal{F}_{\mathcal{G}}$  is a  $P$ -Donsker class then*

$$\sup_{f \in \mathcal{F}} \|E_n(f | \mathcal{G}) - E(f | \mathcal{G})\|_{\mathcal{L}^1(P)} \in O_P^*(n^{-1/2}).$$

Furthermore, if  $\mathcal{C} \subseteq \mathcal{B}_{\mathfrak{S}}$ , is such that  $\mathcal{C}_{\mathcal{G}}$  is a  $P$ -Donsker class then

$$\sup_{A \in \mathcal{C}} \|P_n(A | \mathcal{G}) - P(A | \mathcal{G})\|_{\mathcal{L}^1(P)} \in O_P^*(n^{-1/2}).$$

*Proof.* If  $P(B) = 0$  for some  $B \in \mathcal{G}$  then  $\int_B (E_n(f | \mathcal{G}) - E(f | \mathcal{G})) dP = 0$ . Let  $\mathcal{G}' = \{B : B \in \mathcal{G}, P(B) > 0\}$  then from Proposition 3.1 it follows that

$$\sup_{f \in \mathcal{F}} \sup_{B \in \mathcal{G}'} |E_n(f | B) - E(f | B)| \in O_P^*(n^{-1/2}).$$

For  $\epsilon > 0$ , choose  $M, N$  such that  $F_n = \{\sup_{f \in \mathcal{F}} \sup_{B \in \mathcal{G}'} |E_n(f | B) - E(f | B)| \leq Mn^{-1/2}\}$  has probability  $P(F_n) \geq 1 - \epsilon$  for all  $n \geq N$ . For  $B \in \mathcal{G}'$ , let  $B_1, \dots, B_m \in \mathcal{P}_{\mathcal{G}} \subseteq \mathcal{G}$  such that  $B = B_1 \cup \dots \cup B_m$ , then  $P$ -a.s.  $E(f | \mathcal{G}) = \sum_{i \leq m} E(f | B_i) \times \chi_{B_i}$  and

$$\begin{aligned} \left| \int_B (E_n(f | \mathcal{G}) - E(f | \mathcal{G})) dP \right| &\leq \sum_{i \leq m} \left| \int_{B \cap B_i} (E_n(f | B_i) - E(f | B_i)) dP \right| \\ &\leq \sum_{i \leq m} |E_n(f | B_i) - E(f | B_i)| P(B \cap B_i) \leq Mn^{-1/2} \sum_{i \leq m} P(B \cap B_i) \\ &= Mn^{-1/2} P(B) \leq Mn^{-1/2}. \end{aligned}$$

Furthermore,

$$\|E_n(f | \mathcal{G}) - E(f | \mathcal{G})\|_{\mathcal{L}^1(P)} \leq 2 \sup_{B \in \mathcal{G}} \left| \int_B E_n(f | \mathcal{G}) - E(f | \mathcal{G}) dP \right| \leq 2Mn^{-1/2}.$$

This implies the result. The second result follows again from the first.  $\square$

**Proposition B.4** (Proof of Proposition 3.4). *Let  $([0, 1]^d, \mathcal{B}, P)$  be a probability space such that  $P$  has a density  $p$  that is lower bounded by  $b > 0$  and let  $\{\lambda_n\}_{n \geq 1}$  be a non-decreasing sequence in  $\mathbb{N}_+$  such that*

$$\lambda_n \in o\left(\frac{1}{3d \log(2)} \log\left(\frac{n}{\sqrt{\log(n)}}\right)\right).$$

*If  $\mathcal{F}$  is a subset of  $\mathcal{L}^1(P)$  uniformly bounded in supremum norm which fulfills Equation 4, then*

$$\sup_{f \in \mathcal{F}} \|E_n(f | \mathcal{G}_{\lambda_n}) - E(f | \mathcal{G}_{\lambda_n})\|_{\infty} \in O_P^*(\sqrt{\log(n)} 2^{(3/2)d\lambda_n} n^{-1/2}).$$

Furthermore, if  $\mathcal{C} \subseteq \mathcal{B}_{\mathfrak{S}}$ , is such that  $\mathcal{C}$  fulfills Equation 4 then

$$\sup_{A \in \mathcal{C}} \|P_n(A | \mathcal{G}_{\lambda_n}) - P(A | \mathcal{G}_{\lambda_n})\|_{\infty} \in O_P^*(\sqrt{\log(n)} 2^{(3/2)d\lambda_n} n^{-1/2}).$$

*Proof.* By assumption and from Corollary 2.1 we know that

$$\begin{aligned} \sup_{f \in \mathcal{F}} \sup_{B \in \mathcal{G}_{\lambda_n}} \left| \int_B f dP_n - \int_B f dP \right| &\in O_P^*(\sqrt{\log(n)} 2^{d\lambda_n/2} n^{-1/2}), \\ \sup_{B \in \mathcal{G}_{\lambda_n}} |P_n(B) - P(B)| &\in O_P^*(\sqrt{\log(n)} 2^{d\lambda_n/2} n^{-1/2}). \end{aligned}$$

Furthermore,  $\inf_{B \in \mathcal{G}_{\lambda_n}} P(B) \geq b 2^{-d\lambda_n}$ . By combining the technique in the proof of Proposition 3.2 with the assumption on the rate of  $\lambda_n$  we have for any  $B \in \mathcal{G}_{\lambda_n}$  that

$$\left\{ P_n(B) < \inf_{B' \in \mathcal{G}_{\lambda_n}} P(B')/2 \right\} \subseteq \left\{ \sup_{B \in \mathcal{G}_{\lambda_n}} |P(B) - P_n(B)| > M \sqrt{\log(n)} 2^{d\lambda_n/2} n^{-1/2} \right\}$$

for some constant  $N, M$  and all  $n \geq N$ . The same line of reasoning as in Proposition 3.2 then shows

$$\sup_{f \in \mathcal{F}} \sup_{B \in \mathcal{G}_{\lambda_n}} |E_n(f|B) - E(f|B)| \in O_P^*(\sqrt{\log(n)} 2^{(3/2)d\lambda_n} n^{-1/2}).$$

Substituting in the definition of  $E_n(f|\mathcal{G}_{\lambda_n})$  and  $E(f|\mathcal{G}_{\lambda_n})$  gives us the first result,

$$\sup_{f \in \mathcal{F}} \|E_n(f|\mathcal{G}_{\lambda_n}) - E(f|\mathcal{G}_{\lambda_n})\|_{\infty} \leq \sup_{f \in \mathcal{F}} \sup_{B \in \mathcal{G}_{\lambda_n}} |E_n(f|B) - E(f|B)| \in O_P^*(\sqrt{\log(n)} 2^{(3/2)d\lambda_n} n^{-1/2}).$$

The second claim is directly implied by this result. □
